# Supplementary material for: A colorimetric paper sensor for visual detection of mercury ions constructed with dual-emission carbon dots
Source: Royal Society of Chemistry journal article supplement (doi:10.1039/c8nj03683g), 2018-01-01
Supplement: c8nj03683g1.pdf [file c8nj03683g1.pdf]

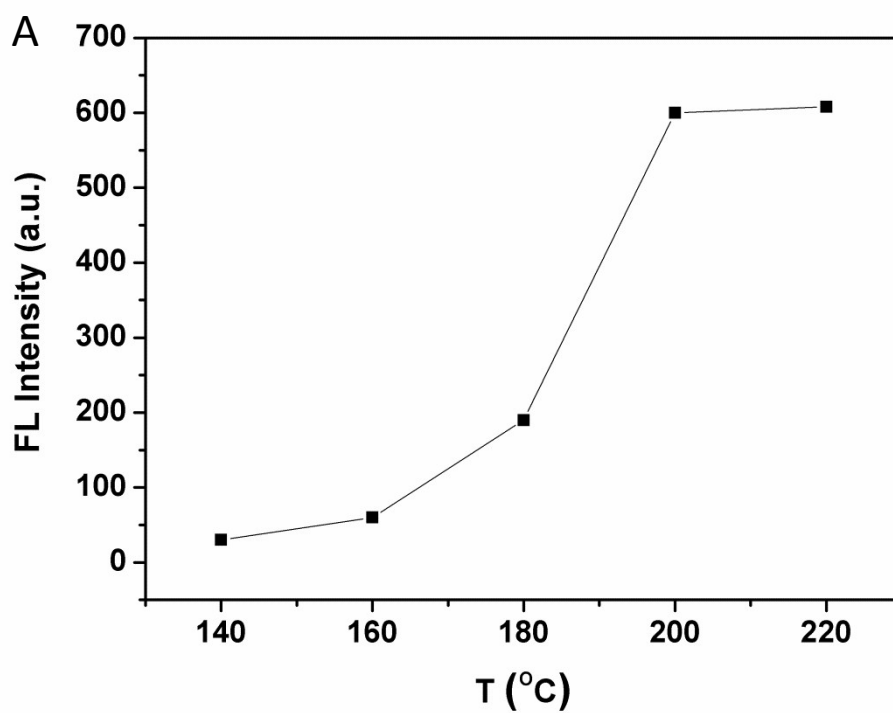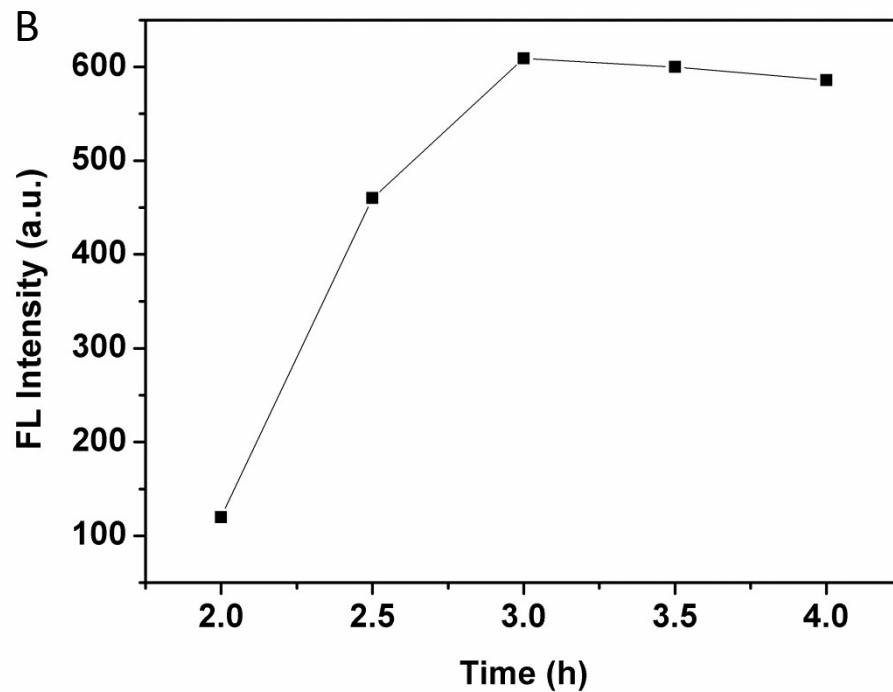

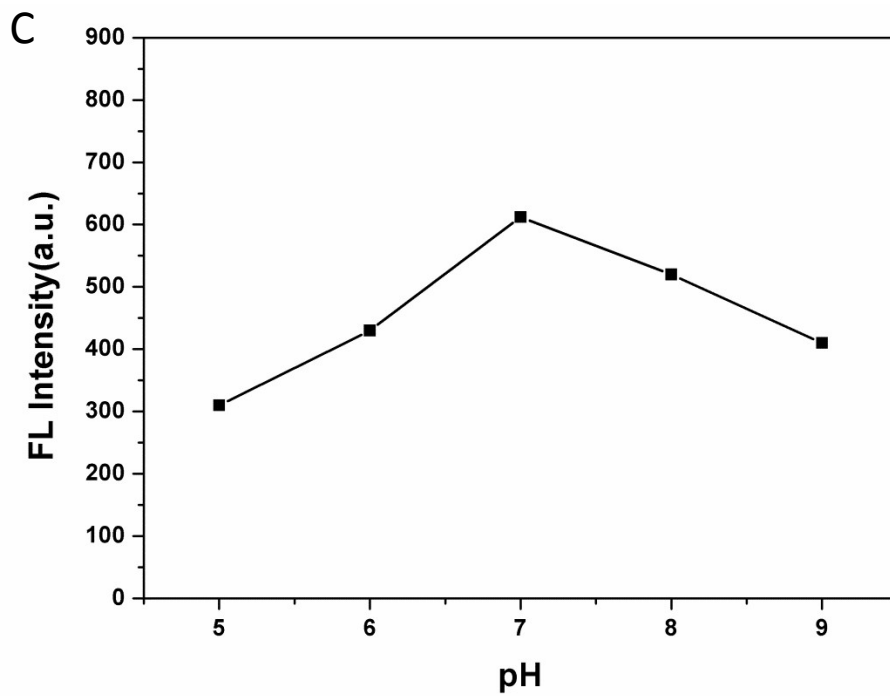

**Figure S1.** Effect of (A) temperature (B) time and (C) pH on the fluorescence intensity of B-CDs

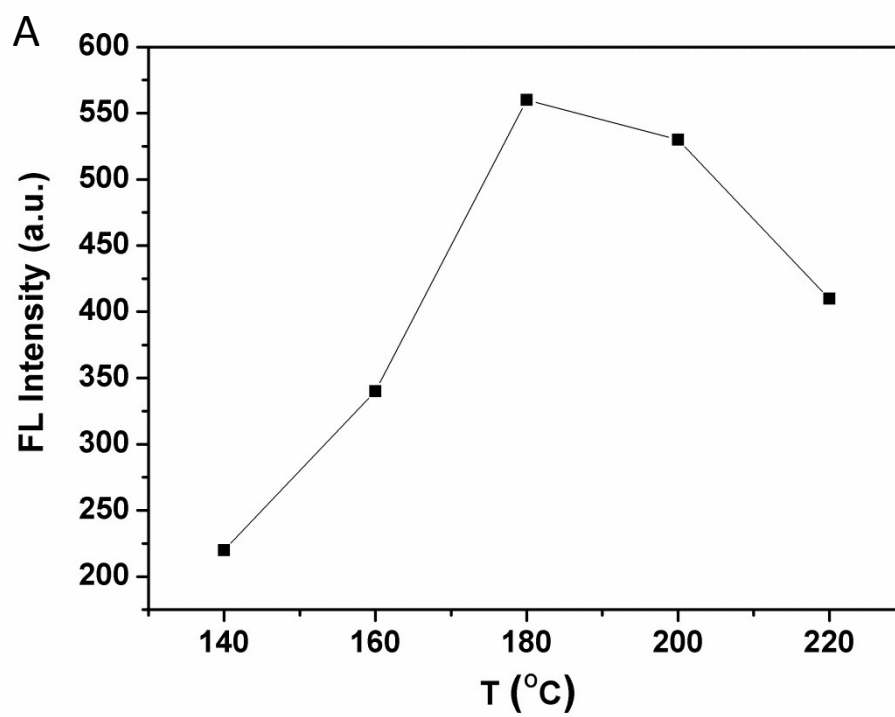

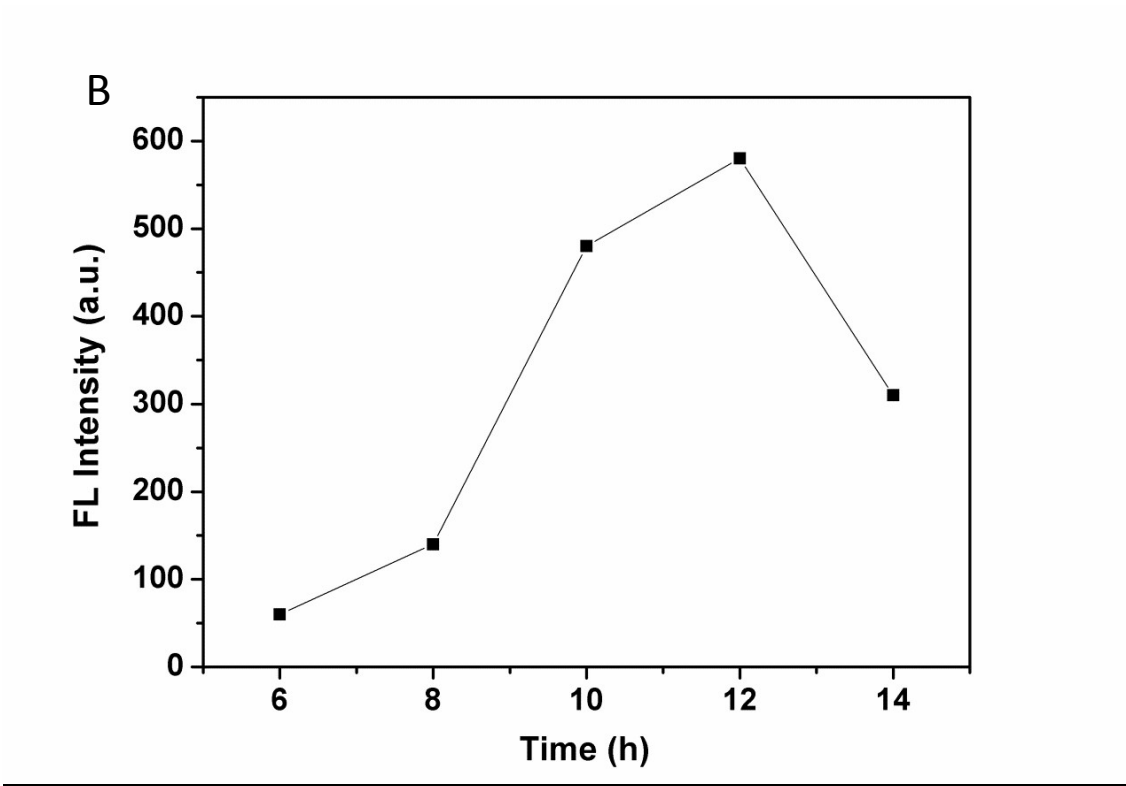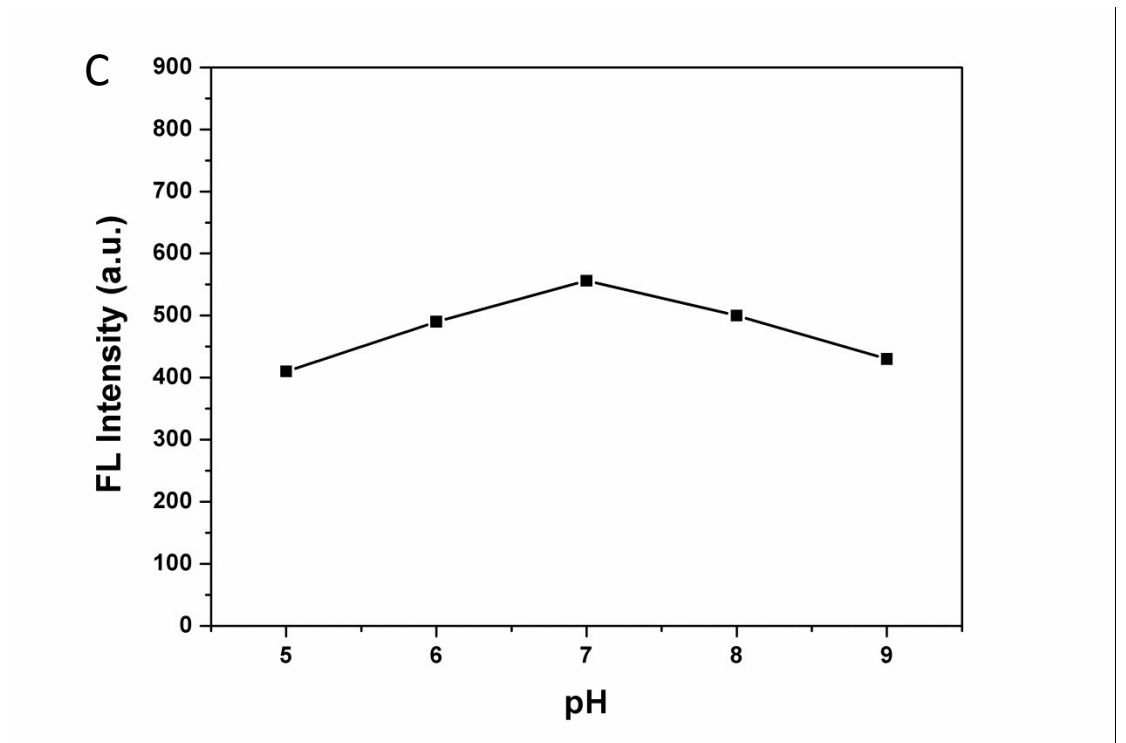

**Figure S2.** Effect of (A) temperature (B) time and (C) pH on the fluorescence intensity of R-  
CDs

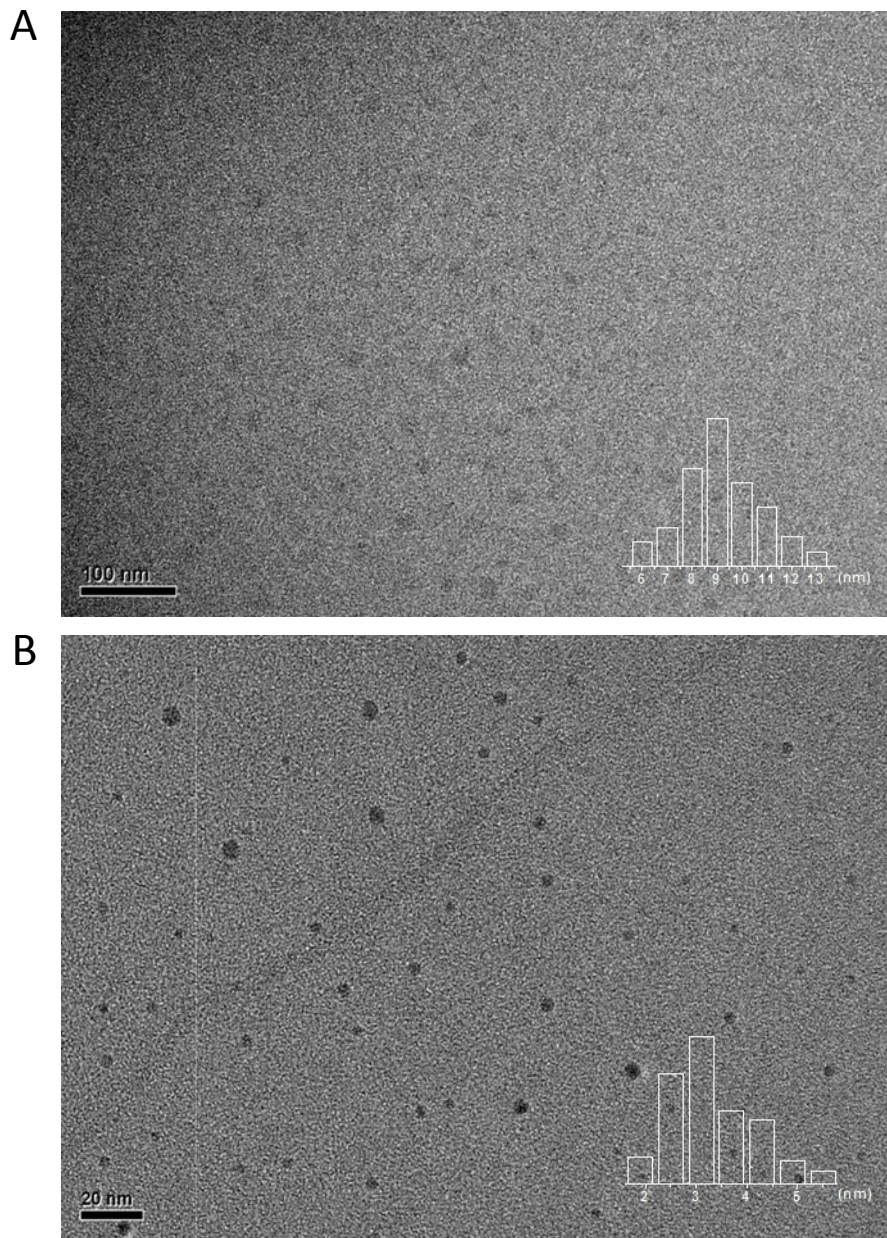

**Figure S3.** (A) TEM image of B-CDs (The inset is the size distribution of B-CDs), (B) TEM image of R-CDs (The inset is the size distribution of R-CDs).

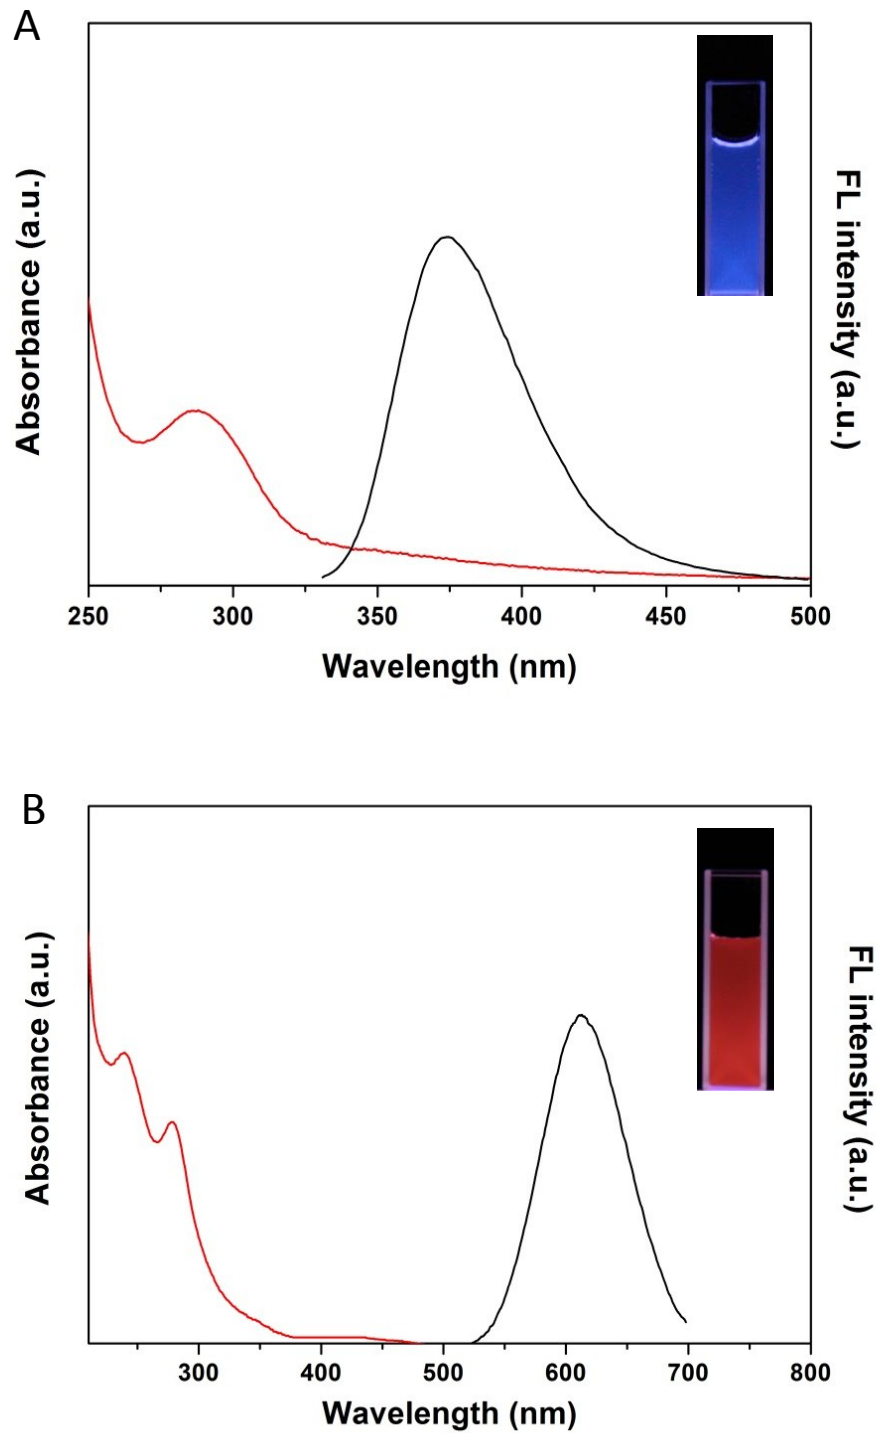

**Figure S4.** (A) UV-vis absorbance and fluorescent emission of B-CDs (The inset show the corresponding color under a 254 nm UV lamp). (B) UV-vis absorbance and fluorescent emission of R-CDs (The inset show the corresponding color under a 254 nm UV lamp).

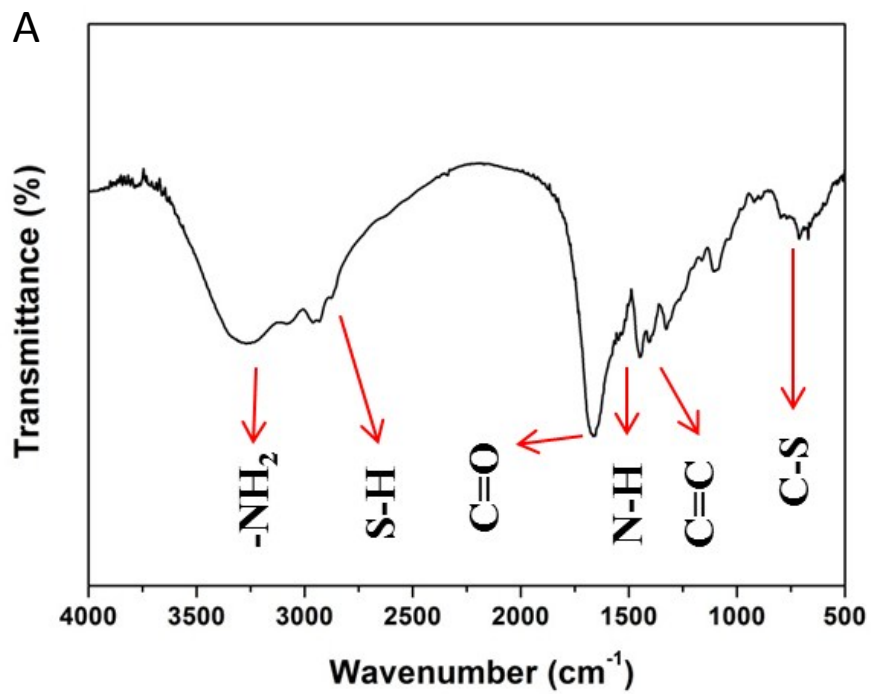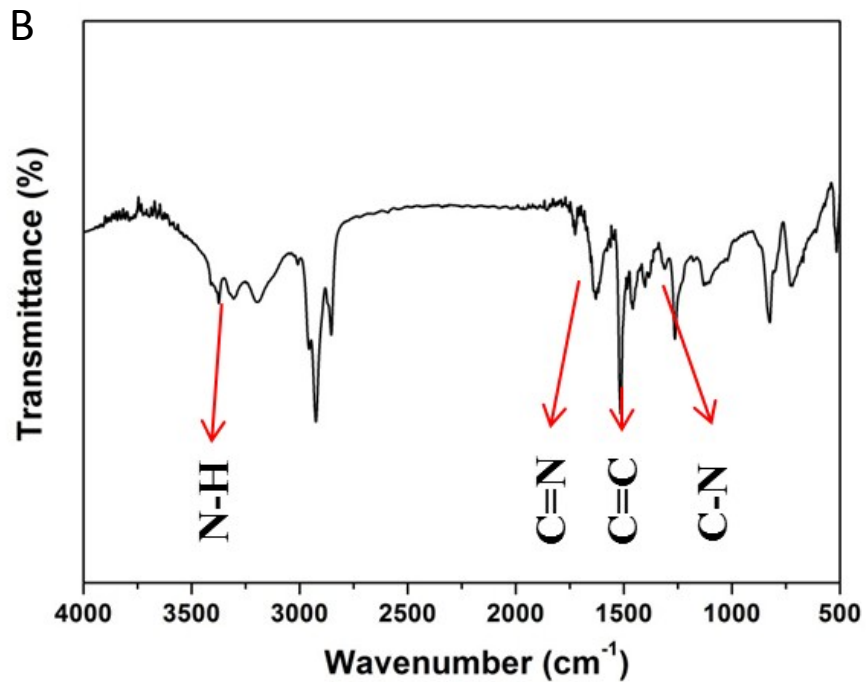

**Figure S5.** The FT-IR spectra (A) of B-CDs and (B) of R-CDs.

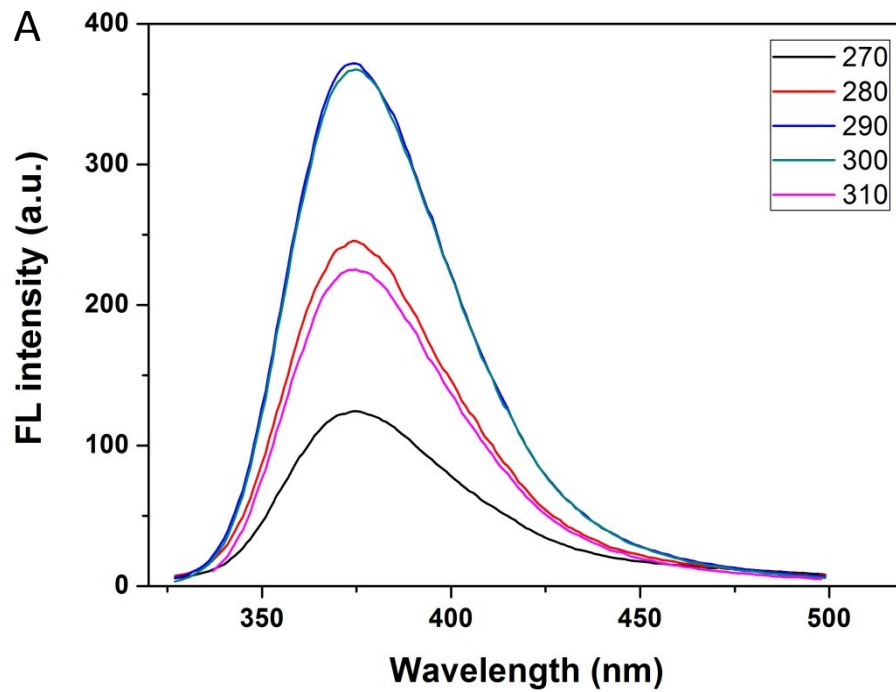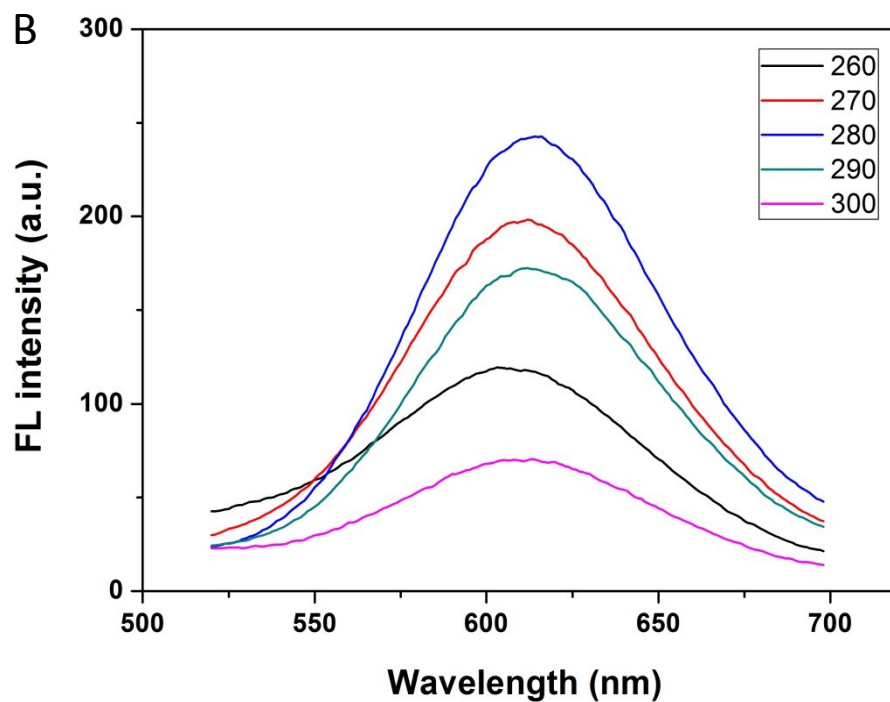

**Figure S6.** (A) FL spectra of the B-CDs excited at different wavelengths, (B) FL spectra of the R-CDs excited at different wavelengths.

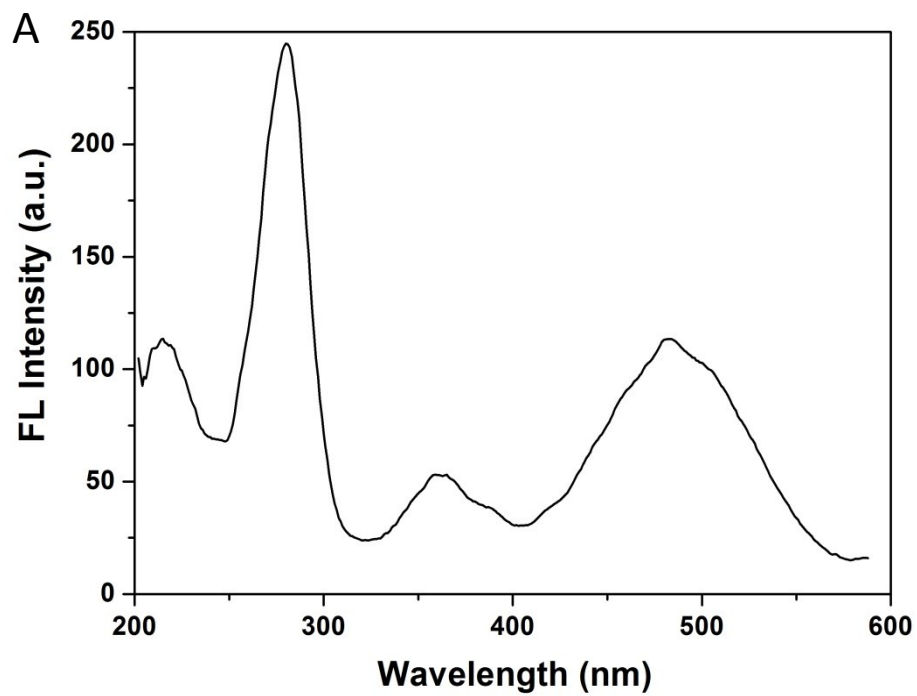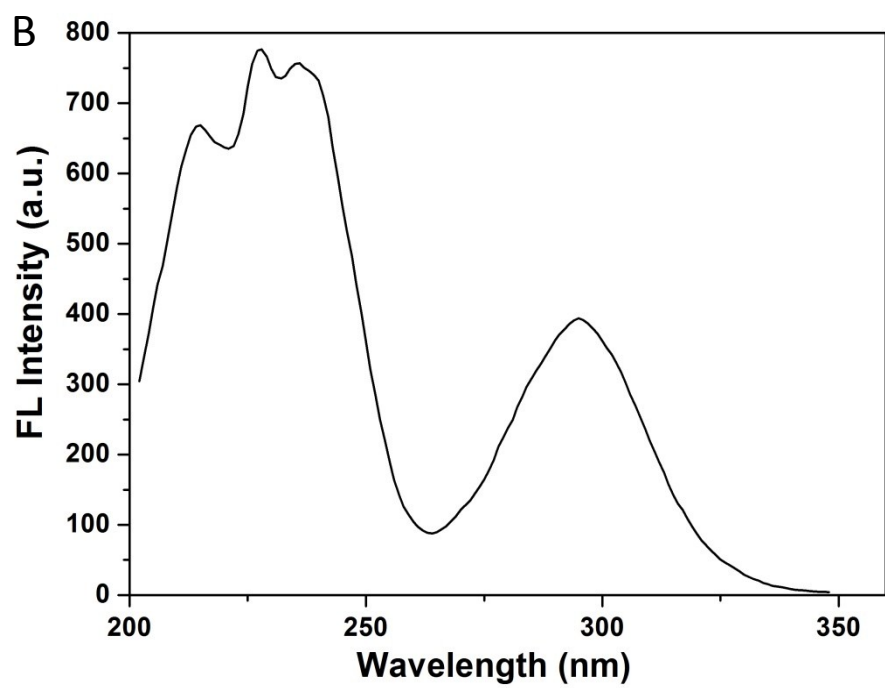

**Figure S7.** The excitation spectrum (A) of B-CDs and (B) of R-CDs.



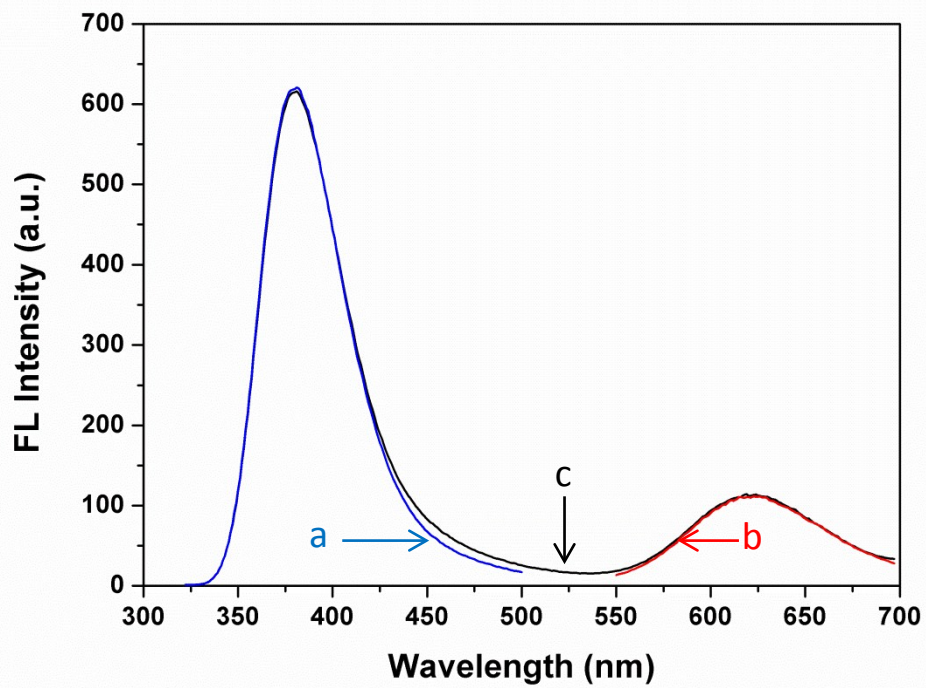

**Figure S8.** Fluorescence emission spectra ( $\lambda_{\text{ex}} = 290$  nm) of (a) B-CDs, (b) R-CDs and (c) mixing B-CDs and R-CDs, respectively.

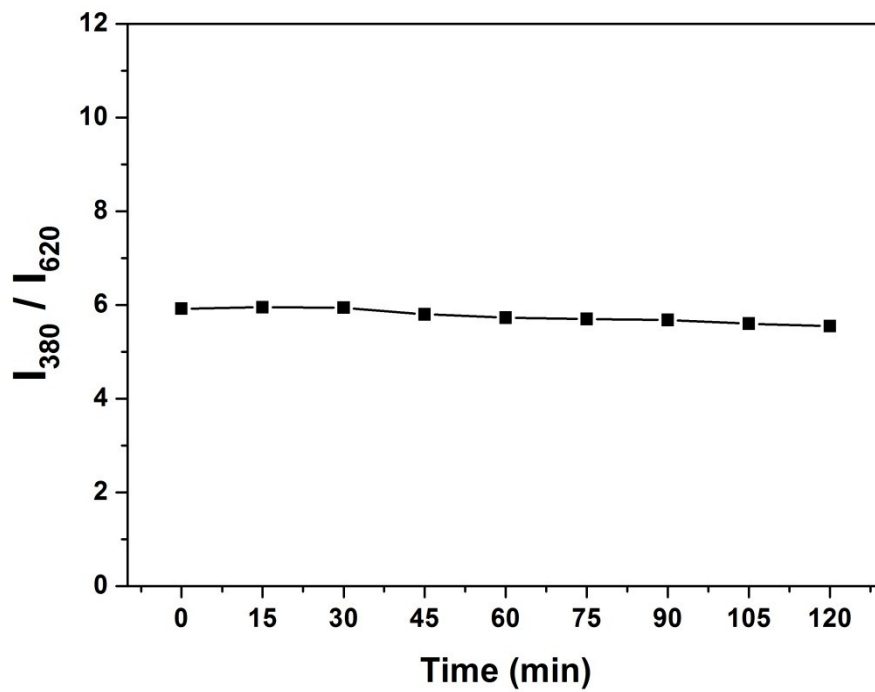

**Figure S9.** Photostability of the ratiometric fluorescence  $I_{380}/I_{620}$  of mixing B-CDs/R-CDs with the time exposed to 254 nm ultraviolet light for 15 min each time ( $I_{380}$  and  $I_{620}$  are the fluorescence intensities of B-CDs and R-CDs, respectively).

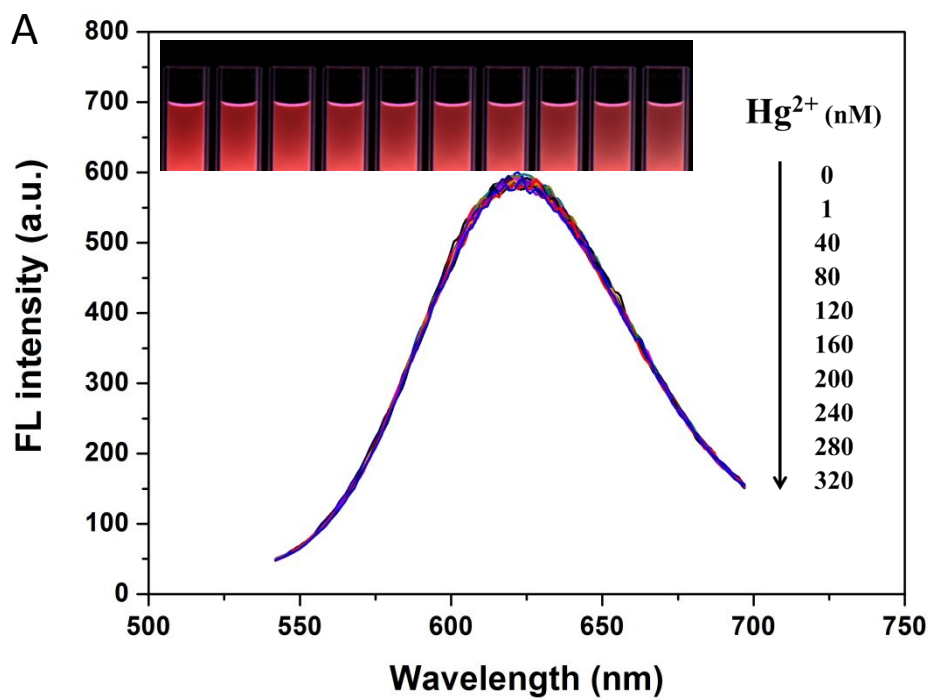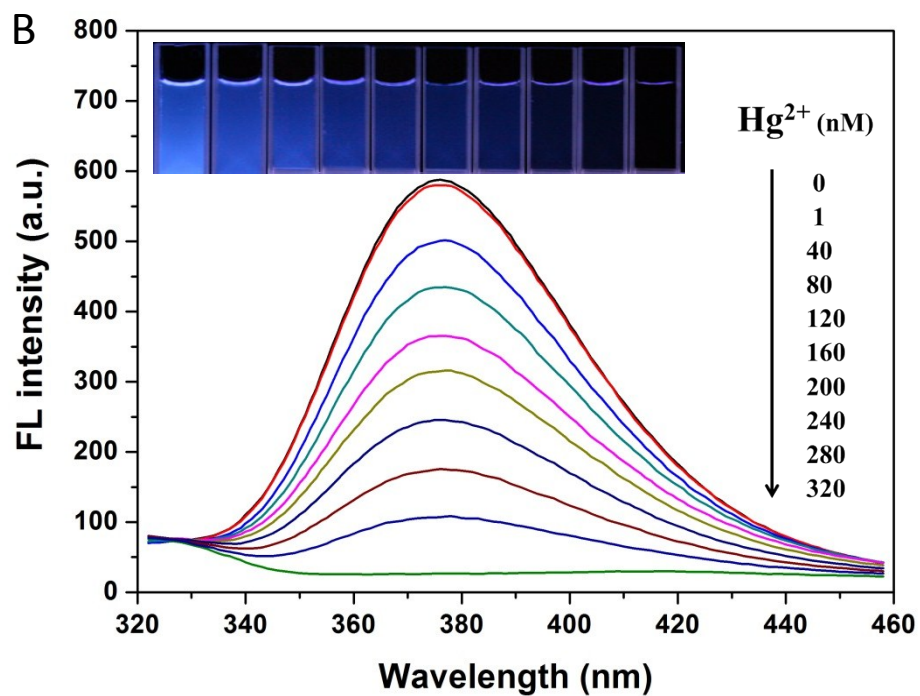

**Figure S10.** The fluorescent emission spectra ( $\lambda_{\text{ex}} = 290$  nm) of (A) R-CDs and (B) B-CDs with the addition of  $\text{Hg}^{2+}$ . The inset photos show the corresponding color evolutions under a 254 nm UV lamp.

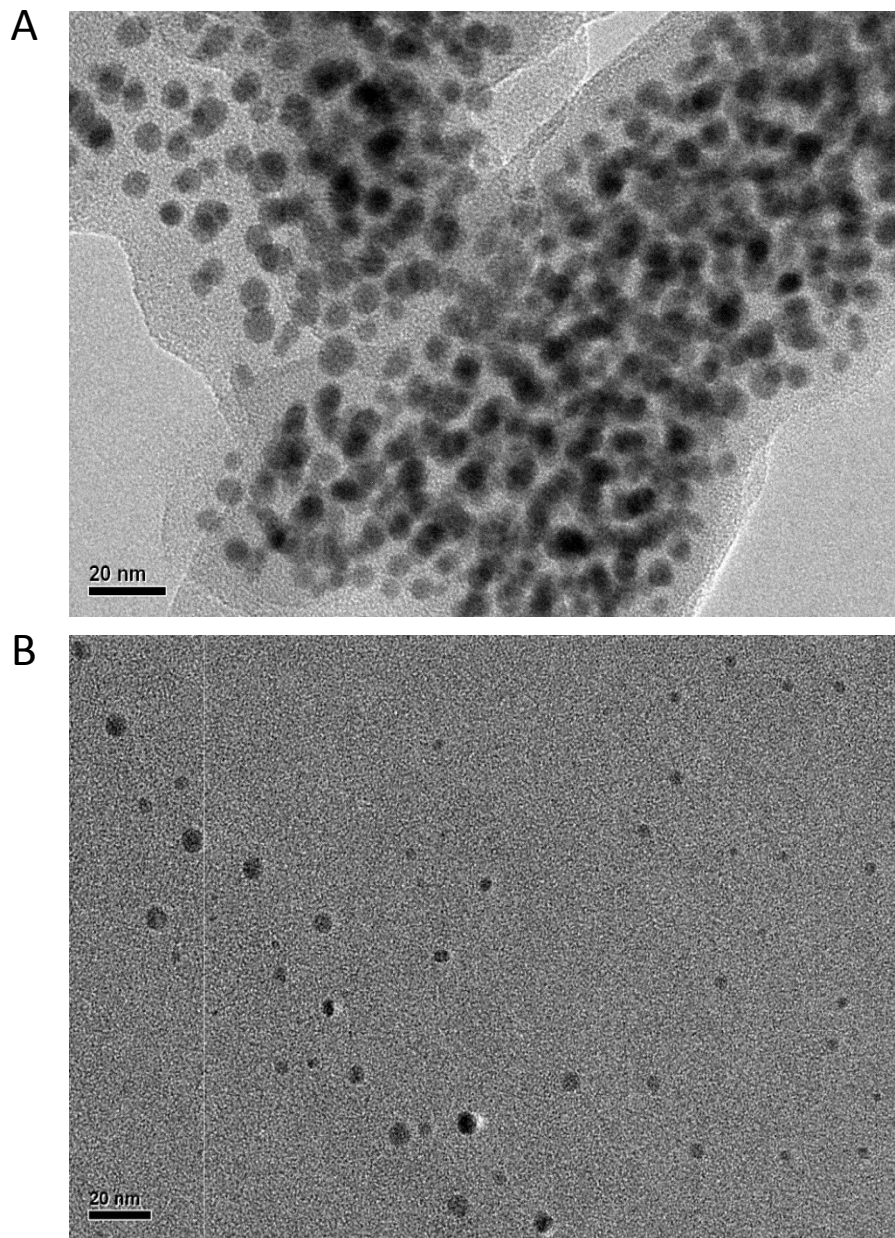

**Figure S11.** The TEM image of (A) B-CDs and (B) R-CDs with the addition of 320 nM  $\text{Hg}^{2+}$ .

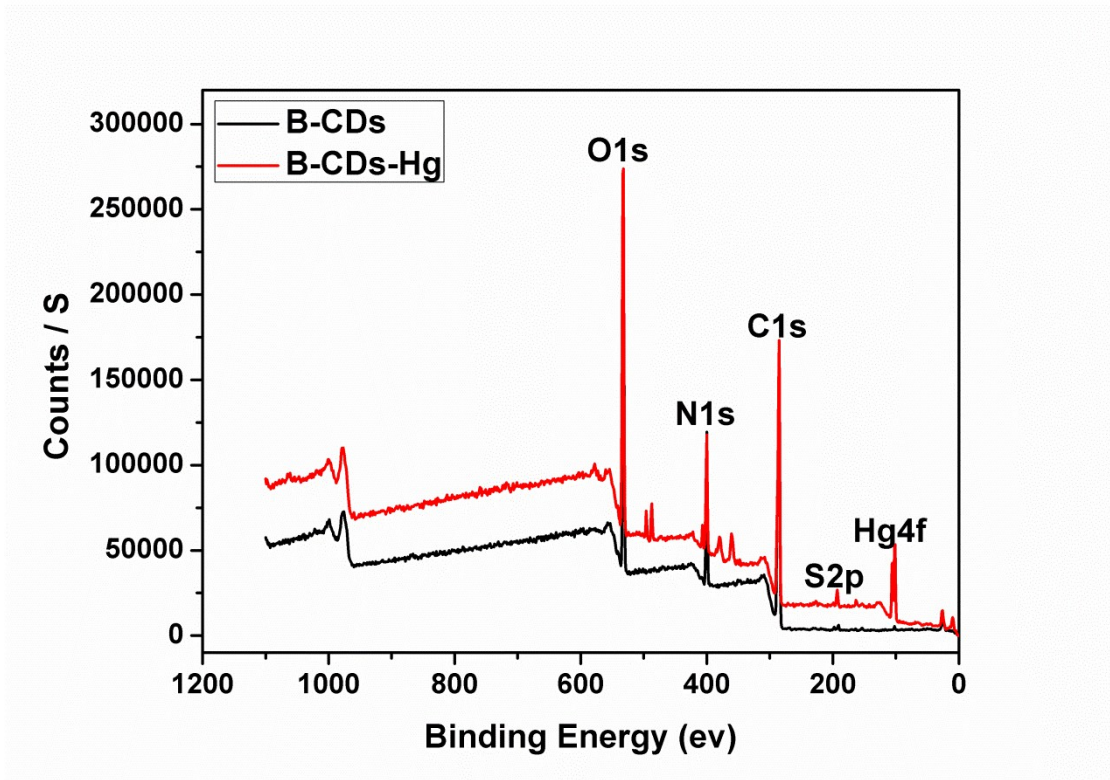

**Figure S12.** XPS spectra of B-CDs (bottom) and B-CDs-Hg complex.

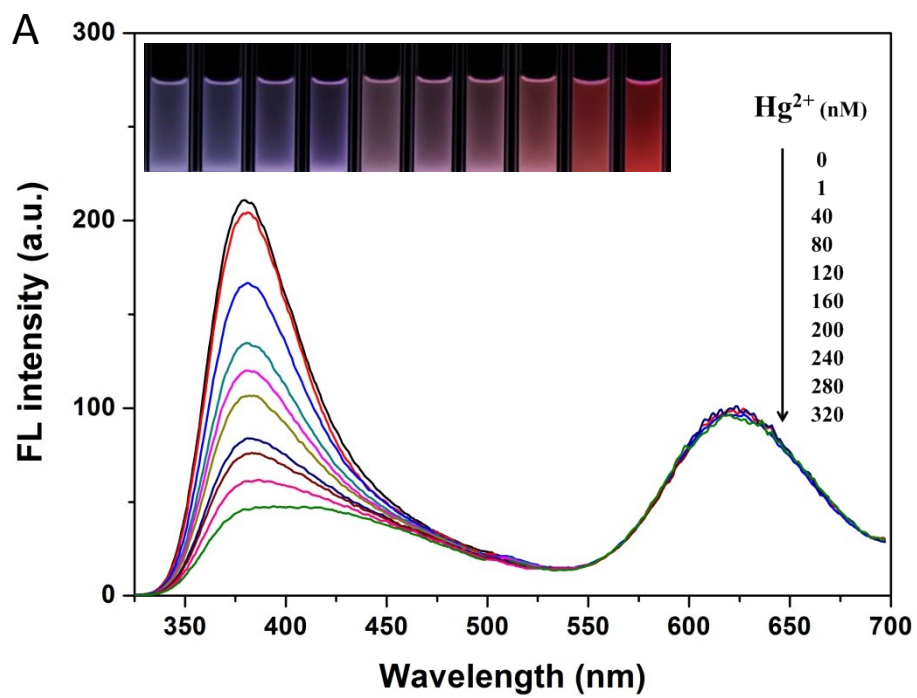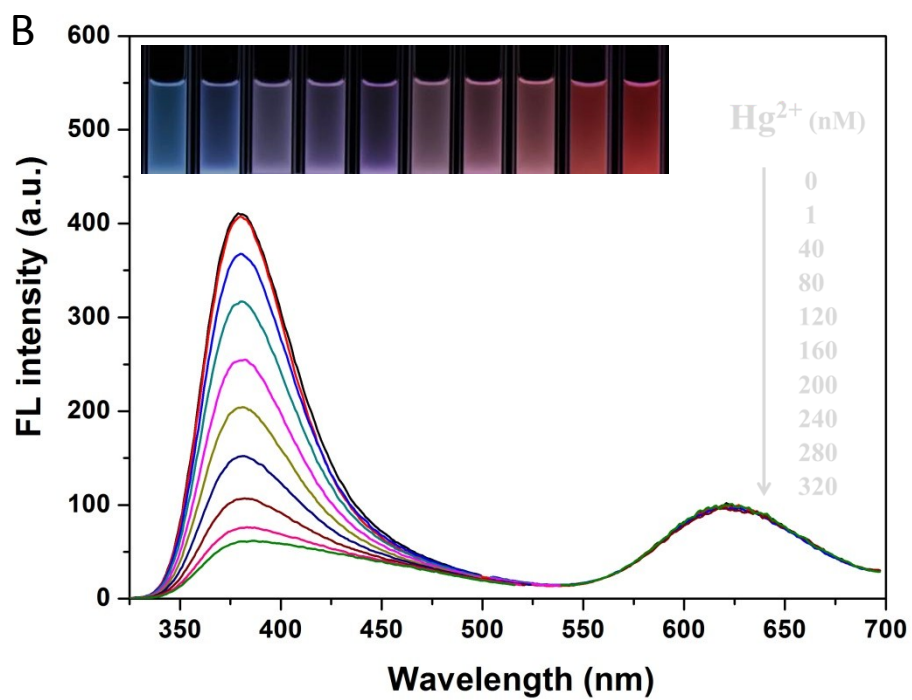

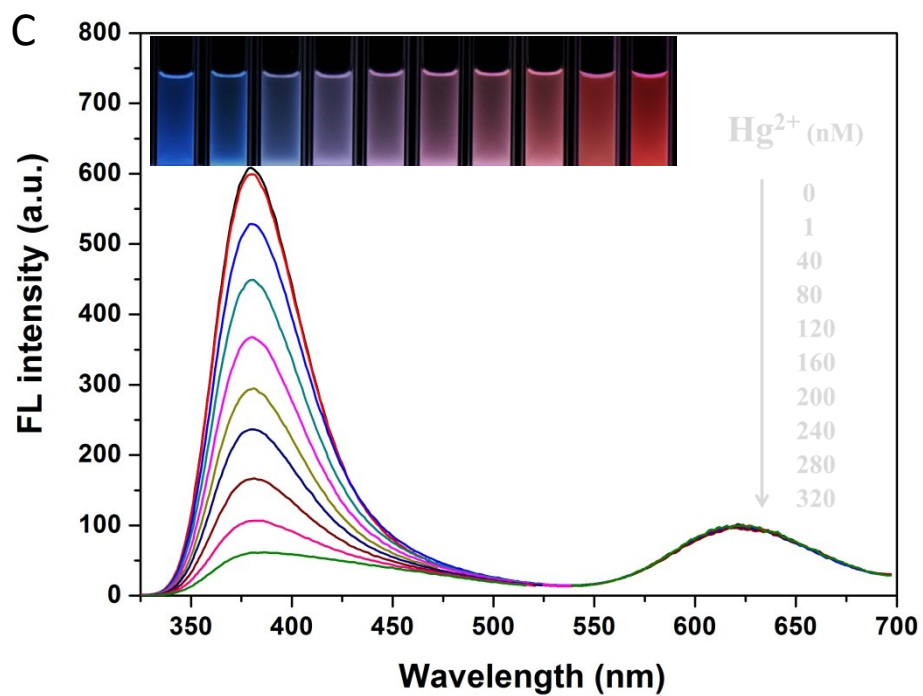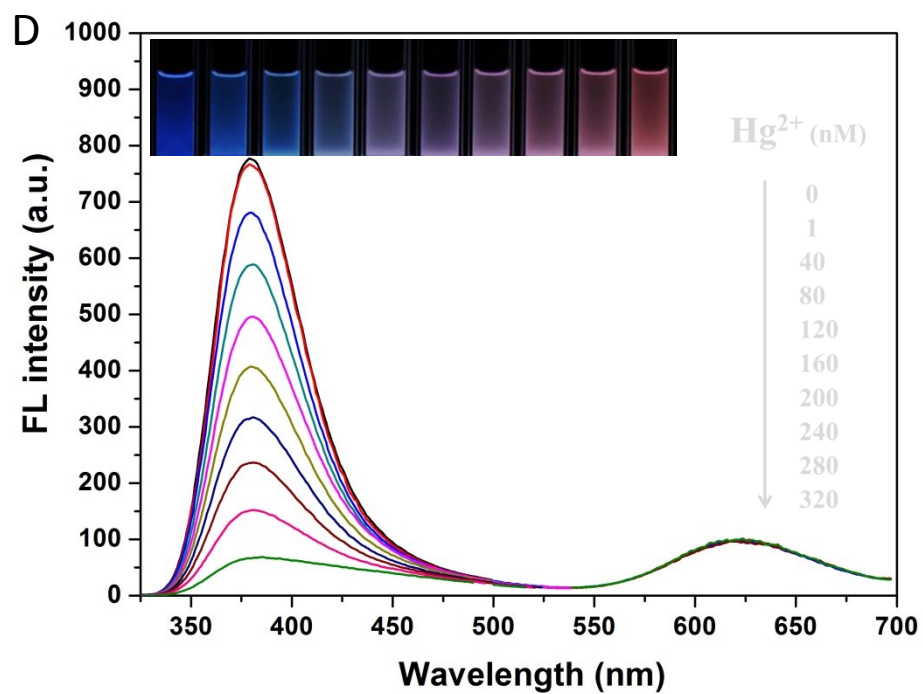

**Figure S13.** The fluorescent spectra of the mixing B-CDs/R-CDs with the addition of  $\text{Hg}^{2+}$ . Before measurements, the fluorescent intensity ratios in the mixing B-CDs/R-CDs were adjusted to (A) 2:1, (B) 4:1, (C) 6:1, and (D) 8:1. The insets show the corresponding fluorescent photos under a 254 nm UV lamp.

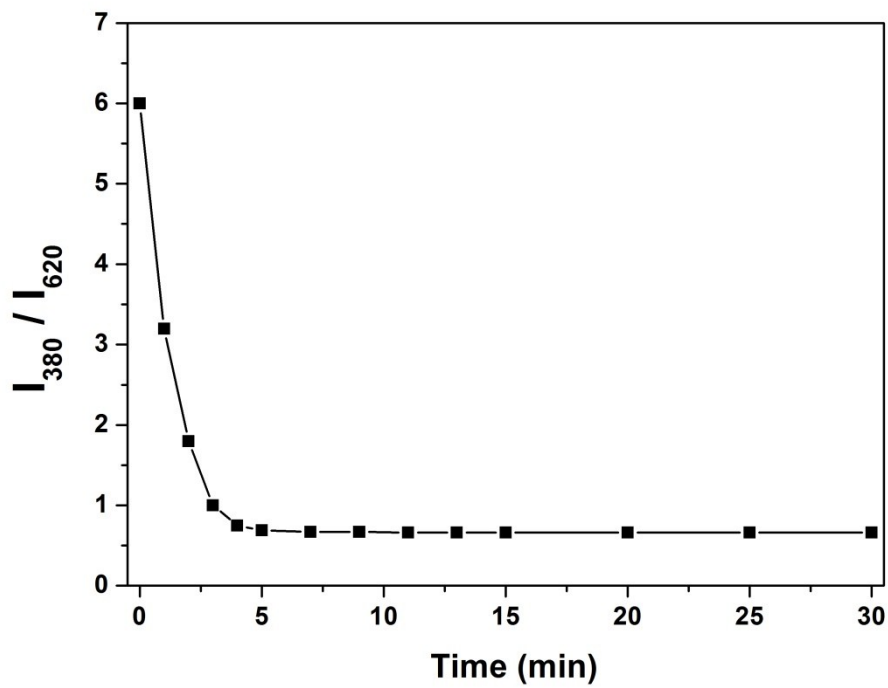

**Figure S14.** The temporal fluorescent response by the ratiometric fluorescence  $I_{380}/I_{620}$  after the addition of 320 nM  $\text{Hg}^{2+}$ .



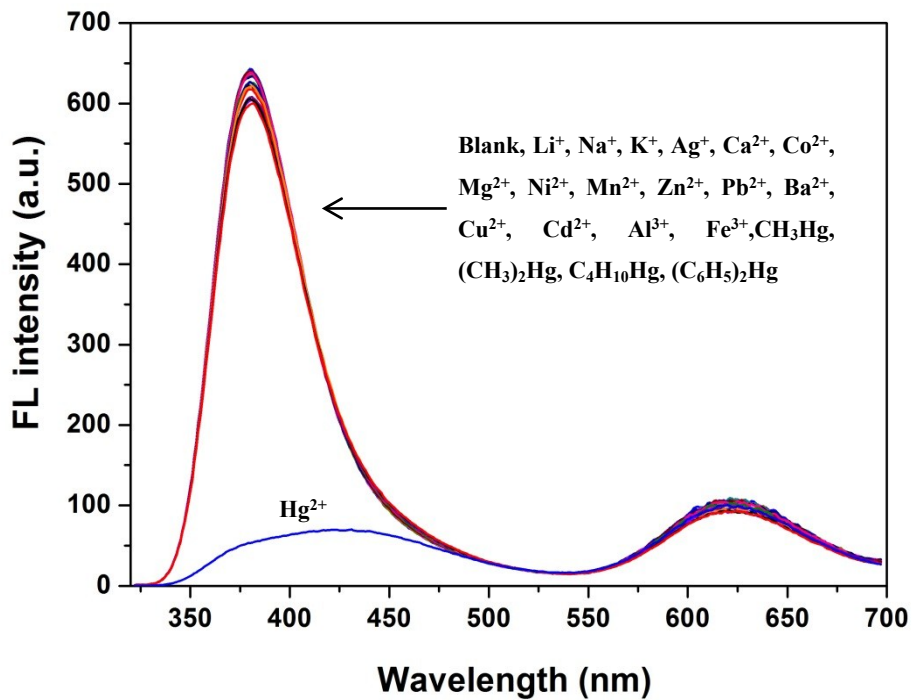

**Figure S15.** The ratiometric fluorescent responses to various metallic ions with  $\text{Hg}^{2+}$ . The selectivity tests were done in HEPES buffer (pH=7.4) with the addition of 1  $\mu\text{M}$  various metallic ions and organic mercury into the mixing B-CDs/R-CDs (6:1 in fluorescent intensity).

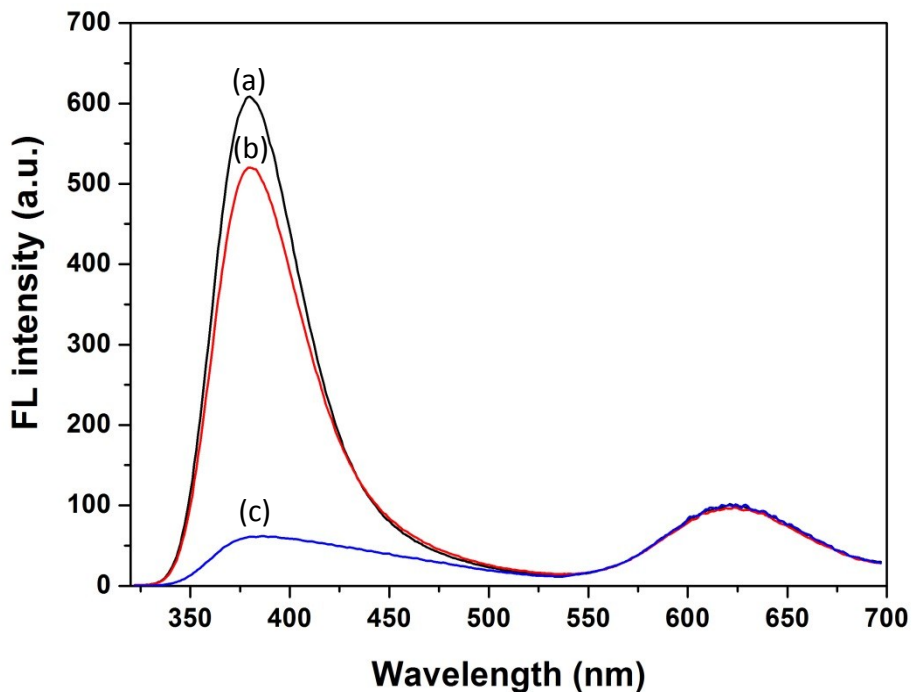

**Figure S16.** The fluorescent spectra of the ratiometric probe after and before the additions of metallic ions. (a) Without any addition of metallic ions. (b) The addition of 1  $\mu\text{M}$   $\text{Li}^+$ ,  $\text{Na}^+$ ,  $\text{K}^+$ ,  $\text{Ag}^+$ ,  $\text{Ca}^{2+}$ ,  $\text{Co}^{2+}$ ,  $\text{Mg}^{2+}$ ,  $\text{Ni}^{2+}$ ,  $\text{Mn}^{2+}$ ,  $\text{Zn}^{2+}$ ,  $\text{Pb}^{2+}$ ,  $\text{Ba}^{2+}$ ,  $\text{Cu}^{2+}$ ,  $\text{Cd}^{2+}$ ,  $\text{Al}^{3+}$ ,  $\text{Fe}^{3+}$  together. (c) A subsequent addition of 320 nM  $\text{Hg}^{2+}$  in (b).

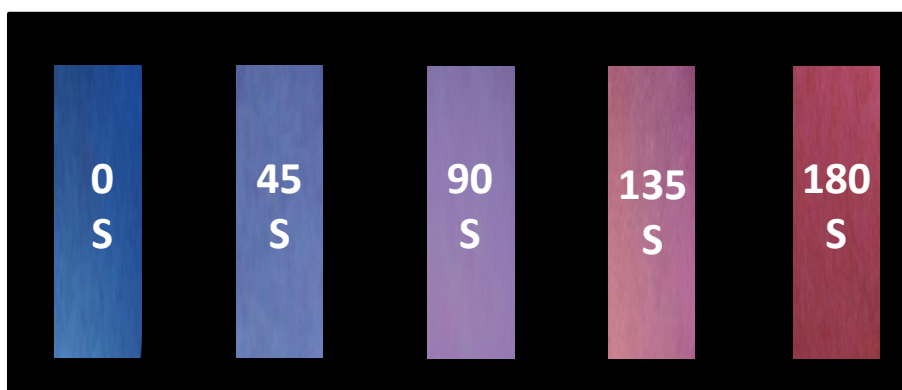

**Figure S17.** The temporal color changes of fluorescent test paper upon the addition of 320 nM  $\text{Hg}^{2+}$ . The photos were taken under a 254 nm UV lamp.
